# Supplementary material for: The relation of dental students’ learning styles to their satisfaction with traditional and inverted classroom models
Source: PubMed Central journal article supplement (PMC6704638; doi:10.1186/s12909-019-1749-x), 2019-08-22
Supplement: 12909_2019_1749_MOESM2_ESM.pdf [file 12909_2019_1749_MOESM2_ESM.pdf]

| <b>Thematic block</b>         | <b>Topic</b>                                            | <b>Online self-study</b>                                                                              | <b>Online quiz</b>                                                                            | <b>Classroom meeting</b>                                                  |
|-------------------------------|---------------------------------------------------------|-------------------------------------------------------------------------------------------------------|-----------------------------------------------------------------------------------------------|---------------------------------------------------------------------------|
| 1 <sup>st</sup> BLOCK<br>CELL | Cell physiology                                         | PPT and other<br>Reading materials                                                                    |                                                                                               | A Lecture on cells,<br>homeostasis, regulation,<br>feedback controls etc. |
| Sub-block1                    | Transport of<br>substances<br>through cell<br>membranes | Micro-lesson videos:<br>1. Cell membrane<br>2. Passive transport<br>3. Active transport<br>4. Cytosis | MCQs mainly based on first<br>lecture topics and block1<br>self-study micro-lesson<br>videos. | Group discussion/mind<br>map show/ interaction<br>with instructors        |
