# Supplementary material for: The relation of dental students’ learning styles to their satisfaction with traditional and inverted classroom models
Source: PubMed Central journal article supplement (PMC6704638; doi:10.1186/s12909-019-1749-x), 2019-08-22
Supplement: 12909_2019_1749_MOESM4_ESM.pdf [file 12909_2019_1749_MOESM4_ESM.pdf]

| Variables           | Traditional approach |                | ICM approach        |                |
|---------------------|----------------------|----------------|---------------------|----------------|
|                     | Odds Ratio (95% CI)  | <i>P</i> Value | Odds Ratio (95% CI) | <i>P</i> Value |
| <b>Converger</b>    | 1                    | 0.1            | 1                   | 0.9            |
| <b>Diverger</b>     | 0.2 (0.02, 1.8)      | 0.1            | 1.9 (0.2, 19.2)     | 0.6            |
| <b>Accommodator</b> | 0.3 (0.05, 1.2)      | 0.1            | 0.8 (0.2, 4)        | 0.8            |
| <b>Assimilator</b>  | 1.5 (0.3, 6.7)       | 0.6            | 0.8 (0.2, 2.8)      | 0.7            |
