# Supplementary material for: The relation of dental students’ learning styles to their satisfaction with traditional and inverted classroom models
Source: PubMed Central journal article supplement (PMC6704638; doi:10.1186/s12909-019-1749-x), 2019-08-22
Supplement: 12909_2019_1749_MOESM5_ESM.pdf [file 12909_2019_1749_MOESM5_ESM.pdf]

**Tests of Between-Subjects Effects**

| Source             | Dependent Variable | Type III<br>Sum of<br>Squares | df | Mean<br>Square | F        | Sig. |
|--------------------|--------------------|-------------------------------|----|----------------|----------|------|
| Corrected<br>Model | Statement 1        | 1.457 <sup>a</sup>            | 3  | .486           | 1.414    | .248 |
|                    | Statement 2        | 3.241 <sup>b</sup>            | 3  | 1.080          | 1.433    | .242 |
|                    | Statement 3        | 6.043 <sup>c</sup>            | 3  | 2.014          | 2.606    | .060 |
|                    | Statement 4        | 3.737 <sup>d</sup>            | 3  | 1.246          | 2.449    | .072 |
| Intercept          | Statement 1        | 729.023                       | 1  | 729.023        | 2123.296 | .000 |
|                    | Statement 2        | 417.977                       | 1  | 417.977        | 554.510  | .000 |
|                    | Statement 3        | 363.360                       | 1  | 363.360        | 470.053  | .000 |
|                    | Statement 4        | 574.840                       | 1  | 574.840        | 1130.187 | .000 |
| Learning Style     | Statement 1        | 1.457                         | 3  | .486           | 1.414    | .248 |
|                    | Statement 2        | 3.241                         | 3  | 1.080          | 1.433    | .242 |
|                    | Statement 3        | 6.043                         | 3  | 2.014          | 2.606    | .060 |
|                    | Statement 4        | 3.737                         | 3  | 1.246          | 2.449    | .072 |
| Error              | Statement 1        | 20.257                        | 59 | .343           |          |      |
|                    | Statement 2        | 44.473                        | 59 | .754           |          |      |
|                    | Statement 3        | 45.608                        | 59 | .773           |          |      |
|                    | Statement 4        | 30.009                        | 59 | .509           |          |      |
| Total              | Statement 1        | 1284.000                      | 63 |                |          |      |
|                    | Statement 2        | 809.000                       | 63 |                |          |      |
|                    | Statement 3        | 745.000                       | 63 |                |          |      |
|                    | Statement 4        | 1074.000                      | 63 |                |          |      |
| Corrected<br>Total | Statement 1        | 21.714                        | 62 |                |          |      |
|                    | Statement 2        | 47.714                        | 62 |                |          |      |
|                    | Statement 3        | 51.651                        | 62 |                |          |      |
|                    | Statement 4        | 33.746                        | 62 |                |          |      |

a. R Squared = .067 (Adjusted R Squared = .020)

b. R Squared = .068 (Adjusted R Squared = .021)

c. R Squared = .117 (Adjusted R Squared = .072)

d. R Squared = .111 (Adjusted R Squared = .066)
